# Supplementary material for: Targeting IGF2BP3 in Cancer
Source: MDPI journal article supplement (doi:10.3390/ijms24119423), 2023-05-29
Supplement: s1 [file s1]

**Table S1.** Roles and targets of IGF2BP3 in various human cancers.

| Tumor type               | Target          | Validated m6A modification | Function                                                               | References |
|--------------------------|-----------------|----------------------------|------------------------------------------------------------------------|------------|
| Leukemia                 | RCC2            | √                          | Inhibits the apoptosis                                                 | [28]       |
|                          | COX-2           |                            | Inhibits the apoptosis                                                 | [29]       |
| Glioma                   | ZNRF3           |                            | Promotes the proliferation and TMZ resistance and inhibits apoptosis   | [39]       |
|                          | LncRNA WEE2-AS1 | √                          | Promotes the proliferation, invasion and dasatinib resistance          | [42]       |
| Ewing sarcoma            | ABCF1           |                            | Promotes the growth and migration                                      | [50]       |
|                          | CD164           |                            | Promotes the migration                                                 | [51]       |
|                          | IGF1R           |                            | Promotes the migration and growth.                                     | [52]       |
| Hepatocellular carcinoma | TRAF5           |                            | Promotes the proliferation and metastasis                              | [55]       |
|                          | Lnc-CTHCC       | √                          | Promotes the proliferation, invasion and angiogenesis                  | [56]       |
|                          | NRF2            | √                          | Inhibits the ferroptosis and promotes sorafenib resistance             | [62]       |
| Gastric cancer           | PKMYT1          | √                          | Promotes the invasion and migration                                    | [68]       |
|                          | HDGF            | √                          | Promotes the growth, metastasis and angiogenesis                       | [69]       |
|                          | SLC7A5          |                            | Promotes the proliferation                                             | [70]       |
|                          | MYC             |                            | Promotes the proliferation and migration                               | [71]       |
|                          | CD44            |                            | Promotes the migration, invasion and EMT                               | [72]       |
| Colorectal cancer        | CCND1           | √                          | Promotes the proliferation and regulates cell cycle                    | [78]       |
|                          | VEGF            | √                          | Promotes angiogenesis                                                  | [78]       |
|                          | MEKK1           |                            | Promotes the proliferation, migration, and invasion                    | [79]       |
|                          | CCND2           |                            | Promotes the proliferation and regulates cell cycle                    | [80]       |
|                          | MAP2K1          |                            | Promotes the proliferation                                             | [81]       |
|                          | TPR             |                            | Promotes the proliferation                                             | [81]       |
| Oral cancer              | GLUT1           | √                          | Promotes aerobic glycolysis                                            | [91]       |
|                          | PDPN            |                            | Promotes the growth and invasion                                       | [92]       |
| Esophageal cancer        | HTR3A           |                            | Promotes the proliferation and migration                               | [97]       |
|                          | KIF18A          |                            | Promotes the proliferation, migration, invasion and radiosensitivity   | [98]       |
| Lung cancer              | GPX4            | √                          | Inhibits the ferroptosis                                               | [103]      |
|                          | SLC3A2          | √                          | Inhibits the ferroptosis                                               | [103]      |
|                          | ACSL3           | √                          | Inhibits the ferroptosis                                               | [103]      |
|                          | FTH1            | √                          | Inhibits the ferroptosis                                               | [103]      |
|                          | TMBIM6          | √                          | Promotes the proliferation, migration, invasion and inhibits apoptosis | [104]      |
|                          | FOXM1           |                            | Promotes the proliferation, migration and EMT                          | [105]      |
|                          | MYC             |                            | Inhibits the apoptosis                                                 | [106]      |
|                          | HMGA2           |                            | Inhibits the apoptosis                                                 | [106]      |
|                          | EIF4E-BP2       |                            | Promotes the proliferation                                             | [107]      |
|                          | TWIST1          | √                          | Promotes the proliferation, migration and invasion                     | [108]      |

|                          |              |   |                                                                            |       |
|--------------------------|--------------|---|----------------------------------------------------------------------------|-------|
| Nasopharyngeal carcinoma | KPNA2        | √ | Promotes the proliferation, invasion, migration and EMT                    | [114] |
|                          | LncRNA TINCR |   | Promotes the proliferation, metastasis, and cisplatin resistances          | [117] |
| Breast cancer            | SLUG         |   | Promotes self-renewal and tumor initiation                                 | [118] |
|                          | MMP9         |   | Promotes the migration and invasion                                        | [119] |
|                          | CD164        |   | Promotes the migration and invasion                                        | [119] |
|                          | MiR145-5p    |   | Activates Hippo signaling                                                  | [120] |
|                          | TRIM25       |   | Promotes the proliferation and regulates cell cycle                        | [121] |
|                          | CERS6        |   | Promotes the proliferation and inhibits apoptosis                          | [122] |
|                          | PR           |   | Promotes the migration and invasion                                        | [124] |
|                          | ABCG2        |   | Promotes doxorubicin and mitoxantrone resistance                           | [129] |
|                          | CD44         |   | Promotes the proliferation and paclitaxel resistance                       | [130] |
|                          | PD-L1        | √ | Promotes immune escape                                                     | [133] |
| Cervical cancer          | RAB2B        |   | Promotes the proliferation                                                 | [136] |
|                          | ACIN1        | √ | Promotes the proliferation and migration                                   | [138] |
|                          | KCNMB2-AS1   | √ | Promotes the proliferation and inhibits the apoptosis                      | [139] |
|                          | HK2          |   | Promotes the aerobic glycolysis                                            | [140] |
|                          | PDK4         | √ | Promotes the proliferation, glycolysis, and doxorubicin resistance         | [141] |
| Ovarian cancer           | SIX4         |   | Promotes the proliferation, migration and invasion, and tube formation     | [143] |
|                          | hCTR1        |   | Promotes the proliferation, migration and invasion and platinum resistance | [145] |
| Endometrial cancer       | E2F3         |   | Promotes the proliferation, migration, and invasion                        | [149] |
| Prostate cancer          | HDAC4        | √ | Promotes EMT and metastasis                                                | [151] |
| Kidney cancer            | CDK4         | √ | Promotes the proliferation                                                 | [153] |
|                          | FN1          | √ | Promotes the invasion and metastasis                                       | [153] |
|                          | COL6A1       | √ | NA                                                                         | [153] |
|                          | LAMA5        | √ | NA                                                                         | [153] |
|                          | CDKN2B-AS1   |   | Promotes the growth and metastasis                                         | [154] |
| Bladder cancer           | BIRC5        | √ | Promotes the proliferation and metastasis                                  | [158] |
|                          | PD-L1        |   | NA                                                                         | [159] |

**Table S2.** Full names of the genes mentioned in the text

| Abbreviation     | Full name                                                     |
|------------------|---------------------------------------------------------------|
| <i>IGF2BP3</i>   | insulin-like growth factor 2 mRNA-binding protein 3           |
| <i>TRAF5</i>     | tumor necrosis factor receptor-associated factor 5            |
| <i>EIF4E-BP2</i> | eukaryotic translation initiation factor 4E binding protein 2 |
| <i>RCC2</i>      | regulator of chromosome condensation 2                        |
| <i>IL-18</i>     | interleukin 18                                                |
| <i>HuR</i>       | human antigen R                                               |
| <i>COX-2</i>     | cyclooxygenase 2                                              |
| <i>ZNRF3</i>     | zinc and ring finger 3                                        |
| <i>ABCF1</i>     | ATP binding cassette subfamily F member 1                     |
| <i>CXCR4</i>     | C-X-C motif chemokine receptor 4                              |

|                 |                                                           |
|-----------------|-----------------------------------------------------------|
| <i>NRF2</i>     | NFE2 like BZIP transcription factor 2                     |
| <i>YBX1</i>     | Y-box binding protein 1                                   |
| <i>ZC3H13</i>   | zinc finger CCCH-type containing 13                       |
| <i>YTHDF1</i>   | YTH N6-methyladenosine RNA binding protein F1             |
| <i>TRMT10C</i>  | tRNA methyltransferase 10C, mitochondrial RNase P subunit |
| <i>YTHDF2</i>   | YTH N6-methyladenosine RNA binding protein F2             |
| <i>RRP8</i>     | ribosomal RNA processing 8                                |
| <i>TRMT6</i>    | tRNA methyltransferase 6 non-catalytic subunit            |
| <i>LRPPRC</i>   | leucine rich pentatricopeptide repeat containing          |
| <i>G6PD</i>     | glucose-6-phosphate dehydrogenase                         |
| <i>ZNF239</i>   | zinc finger protein 239                                   |
| <i>BIRC5</i>    | baculoviral IAP repeat containing 5                       |
| <i>FOXM1</i>    | forkhead box M1                                           |
| <i>CENPA</i>    | centromere protein A                                      |
| <i>KIF4A</i>    | kinesin family member 4A                                  |
| <i>DTYMK</i>    | deoxythymidylate kinase                                   |
| <i>PRC1</i>     | protein regulator of cytokinesis 1                        |
| <i>KIF2C</i>    | kinesin family member 2C                                  |
| <i>TRIP13</i>   | thyroid hormone receptor interactor 13                    |
| <i>THYM</i>     | thymoma                                                   |
| <i>TPX2</i>     | TPX2 microtubule nucleation factor                        |
| <i>PKMYT1</i>   | protein kinase, membrane associated tyrosine/threonine 1  |
| <i>HDGF</i>     | heparin binding growth factor                             |
| <i>SLC7A5</i>   | solute carrier family 7 member 5                          |
| <i>MYC</i>      | MYC proto-oncogene, bHLH transcription factor             |
| <i>ZEB1</i>     | zinc finger E-box binding homeobox 1                      |
| <i>SNAIL1</i>   | snail family transcriptional repressor 1                  |
| <i>CCND1</i>    | cyclin D1                                                 |
| <i>VEGF</i>     | vascular endothelial growth factor                        |
| <i>MEKK1</i>    | mitogen-activated protein kinase kinase kinase 1          |
| <i>CCND2</i>    | cyclin D2                                                 |
| <i>ELAVL1</i>   | ELAV like RNA binding protein 1                           |
| <i>KRAS</i>     | KRAS proto-oncogene, GTPase                               |
| <i>MAP2K1</i>   | mitogen-activated protein kinase kinase 1                 |
| <i>TPR</i>      | translocated promoter region, nuclear basket protein      |
| <i>CCNH</i>     | cyclin H                                                  |
| <i>LARP1</i>    | La ribonucleoprotein 1, translational regulator           |
| <i>YBX1</i>     | Y-box binding protein 1                                   |
| <i>PABPC1L</i>  | poly(A) binding protein cytoplasmic 1 like                |
| <i>PPARGC1A</i> | PPARG coactivator 1 alpha                                 |
| <i>PTRH1</i>    | peptidyl-tRNA hydrolase 1 homolog                         |
| <i>TDRD7</i>    | tudor domain containing 7                                 |
| <i>NOX4</i>     | NADPH oxidase 4                                           |
| <i>DACT3</i>    | dishevelled binding antagonist of beta catenin 3          |

|                 |                                                       |
|-----------------|-------------------------------------------------------|
| <i>EEF1A2</i>   | eukaryotic translation elongation factor 1 alpha 2    |
| <i>BMP5</i>     | bone morphogenetic protein 5                          |
| <i>GCNT2</i>    | glucosaminyl (N-acetyl) transferase 2 (I blood group) |
| <i>SFRP1</i>    | secreted frizzled related protein 1                   |
| <i>GLUT1</i>    | glucose transporter 1                                 |
| <i>PDPN</i>     | podoplanin                                            |
| <i>HTR3A</i>    | 5-hydroxytryptamine receptor 3A                       |
| <i>KIF18A</i>   | kinesin family member 18A                             |
| <i>LY6K</i>     | lymphocyte antigen 6 family member K                  |
| <i>TTK</i>      | TTK protein kinase                                    |
| <i>HNRNPC</i>   | heterogeneous nuclear ribonucleoprotein C             |
| <i>RBM15</i>    | RNA binding motif protein 15                          |
| <i>METTL16</i>  | methyltransferase 16, N6-methyladenosine              |
| <i>KIAA1429</i> | vir like m6A methyltransferase associated             |
| <i>GPX4</i>     | glutathione peroxidase 4                              |
| <i>SLC3A2</i>   | solute carrier family 3 member 2                      |
| <i>ACSL3</i>    | acyl-CoA synthetase long chain family member 3        |
| <i>FTH1</i>     | ferritin heavy chain 1                                |
| <i>STRIP2</i>   | striatin interacting protein 2                        |
| <i>TMBIM6</i>   | transmembrane BAX inhibitor motif containing 6        |
| <i>HMGA2</i>    | high mobility group AT-hook 2                         |
| <i>TWIST1</i>   | twist family bHLH transcription factor 1              |
| <i>ZCCHC4</i>   | zinc finger CCHC-type containing 4                    |
| <i>ALKBH5</i>   | alkB homolog 5, RNA demethylase                       |
| <i>YTHDF3</i>   | YTH N6-methyladenosine RNA binding protein F3         |
| <i>METTL5</i>   | methyltransferase 5, N6-adenosine                     |
| <i>G3BP1</i>    | G3BP stress granule assembly factor 1                 |
| <i>RBMX</i>     | RNA binding motif protein X-linked                    |
| <i>RBM15B</i>   | RNA binding motif protein 15B                         |
| <i>ALDOA</i>    | aldolase, fructose-bisphosphate A                     |
| <i>CASP12</i>   | caspase 12                                            |
| <i>CASP14</i>   | caspase 14                                            |
| <i>EXO1</i>     | exonuclease 1                                         |
| <i>FAT1</i>     | FAT atypical cadherin 1                               |
| <i>FEN1</i>     | flap structure-specific endonuclease 1                |
| <i>GDF15</i>    | growth differentiation factor 15                      |
| <i>HOXB7</i>    | homeobox B7                                           |
| <i>KRT18</i>    | keratin 18                                            |
| <i>MAL</i>      | mal, T cell differentiation protein                   |
| <i>MSX1</i>     | msh homeobox 1                                        |
| <i>NT5E</i>     | 5'-nucleotidase ecto                                  |
| <i>NTSR1</i>    | neurotensin receptor 1                                |
| <i>SIX1</i>     | SIX homeobox 1                                        |
| <i>TXNRD1</i>   | thioredoxin reductase 1                               |

|                |                                                                               |
|----------------|-------------------------------------------------------------------------------|
| <i>UBE2S</i>   | ubiquitin conjugating enzyme E2 S                                             |
| <i>WFDC2</i>   | WAP four-disulfide core domain 2                                              |
| <i>KPNA2</i>   | karyopherin subunit alpha 2                                                   |
| <i>ACLY</i>    | ATP citrate lyase                                                             |
| <i>PADI1</i>   | peptidyl arginine deiminase 1                                                 |
| <i>MMP2</i>    | matrix metalloproteinase 2                                                    |
| <i>MMP9</i>    | matrix metalloproteinase 9                                                    |
| <i>SLUG</i>    | snail family transcriptional repressor 2                                      |
| <i>WNT5B</i>   | Wnt family member 5B                                                          |
| <i>TRIM25</i>  | tripartite motif containing 25                                                |
| <i>CERS6</i>   | ceramide synthase 6                                                           |
| <i>PR</i>      | progesterone receptor                                                         |
| <i>ABCG2</i>   | ATP binding cassette subfamily G member 2                                     |
| <i>IGF2</i>    | insulin like growth factor 2                                                  |
| <i>PD-L1</i>   | programmed cell death 1 ligand 1                                              |
| <i>RAB2B</i>   | RAB2B, member RAS oncogene family                                             |
| <i>ACIN1</i>   | apoptotic chromatin condensation inducer 1                                    |
| <i>HK2</i>     | hexokinase 2                                                                  |
| <i>PDK4</i>    | pyruvate dehydrogenase kinase 4                                               |
| <i>SIX4</i>    | SIX homeobox 4                                                                |
| <i>L1CAM</i>   | L1 cell adhesion molecule                                                     |
| <i>E2F3</i>    | E2F transcription factor 3                                                    |
| <i>HDAC4</i>   | histone deacetylase 4                                                         |
| <i>ARHGAP5</i> | Rho GTPase activating protein 5                                               |
| <i>CDK4</i>    | cyclin dependent kinase 4                                                     |
| <i>COL6A1</i>  | collagen type VI alpha 1 chain                                                |
| <i>LAMA5</i>   | laminin subunit alpha 5                                                       |
| <i>FN1</i>     | fibronectin 1                                                                 |
| <i>NUF2</i>    | NUF2 component of NDC80 kinetochore complex                                   |
| <i>METTL3</i>  | methyltransferase 3, N6-adenosine-methyltransferase complex catalytic subunit |
| <i>HIF1A</i>   | hypoxia inducible factor 1 subunit alpha                                      |
| <i>BIRC5</i>   | baculoviral IAP repeat containing 5                                           |
| <i>LRPPRC</i>  | leucine rich pentatricopeptide repeat containing                              |
| <i>YTHDC1</i>  | YTH N6-methyladenosine RNA binding protein C1                                 |
| <i>WTAP</i>    | WT1 associated protein                                                        |
| <i>IGF1R</i>   | insulin like growth factor 1 receptor                                         |

---
